CORRECTION

# Correction: The Zinc-Finger Protein SOP1 Is Required for a Subset of the Nuclear Exosome Functions in Arabidopsis

Kian Hématy, Yannick Bellec, Ram Podicheti, Nathalie Bouteiller, Pauline Anne, Céline Morineau, Richard P. Haslam, Frederic Beaudoin, Johnathan A. Napier, Keithanne Mockaitis, Dominique Gagliardi, Hervé Vaucheret, Heike Lange, Jean-Denis Faure

[S2 Table](#) is incomplete. Please view the complete [S2 Table](#) here.

There is an error in the third subsection of the Results section, entitled “*sop1* specifically suppresses the splicing-defective *pas2-1* allele”. The sentence “For this purpose, we introgressed *sop1-5*, a knock-out allele, that harbours a T-DNA insertion in the At5g21580 locus which encodes the SOP1 protein (see below), into the original *pas2-1* mutant as well as into *pas1-2*, *pas2-4* and *pas3-1* mutants [16,21,22].” should read: “For this purpose, we introgressed *sop1-5*, a knock-out allele, that harbours a T-DNA insertion in the At1g21580 locus which encodes the SOP1 protein (see below), into the original *pas2-1* mutant as well as into *pas1-2*, *pas2-4* and *pas3-1* mutants [16,21,22].”

## Supporting Information

**S2 Table. Primers used in this study.**  
(XLSX)

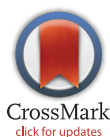

## Reference

1. Hématy K, Bellec Y, Podicheti R, Bouteiller N, Anne P, Morineau C, et al. (2016) The Zinc-Finger Protein SOP1 Is Required for a Subset of the Nuclear Exosome Functions in Arabidopsis. PLoS Genet 12 (2): e1005817. doi:[10.1371/journal.pgen.1005817](https://doi.org/10.1371/journal.pgen.1005817) PMID: [26828932](https://pubmed.ncbi.nlm.nih.gov/26828932/)

## OPEN ACCESS

**Citation:** Hématy K, Bellec Y, Podicheti R, Bouteiller N, Anne P, Morineau C, et al. (2016) Correction: The Zinc-Finger Protein SOP1 Is Required for a Subset of the Nuclear Exosome Functions in Arabidopsis. PLoS Genet 12(3): e1005958. doi:[10.1371/journal.pgen.1005958](https://doi.org/10.1371/journal.pgen.1005958)

**Published:** March 23, 2016

**Copyright:** © 2016 Hématy et al. This is an open access article distributed under the terms of the [Creative Commons Attribution License](https://creativecommons.org/licenses/by/4.0/), which permits unrestricted use, distribution, and reproduction in any medium, provided the original author and source are credited.
